# Supplementary material for: UCA-YOLOv8n: a real-time and efficient fruit chunks detection algorithm for meal-assistance robot
Source: PeerJ journal article supplement (doi:10.7717/peerj-cs.2832), 2025-04-15
Supplement: README.pdf [file README.pdf]

# UCA-YOLOv8n

----- Fei Liu -----

The version of ultralytics used in this project is 8.1.9, and `__version__` is identified in `ultralytics/__init__.py`.

The environment of my experiment:

```
python: 3.8.16
torch: 1.13.1+cu117
torchvision: 0.14.1+cu117
timm: 0.9.8
mimcv: 2.1.0
mmengine: 0.9.0
```

## Environment configuration

1. `pip install ultralytics`

2. Additional package installation commands required:

```
pip install timm==0.9.8 thop efficientnet_pytorch==0.7.1 einops grad-cam==1.4.8 dill==0.3.6
albumentations==1.3.1 pytorch_wavelets==1.3.0 -i https://pypi.tuna.tsinghua.edu.cn/simple
```

The following are mainly used dyhead must be installed packages, if the installation is not successful dyhead can not be used normally! If the execution is still unsuccessful, see the `mmcv` installation problem at the bottom.

```
pip install -U openmim
mim install mmengine -i https://pypi.tuna.tsinghua.edu.cn/simple
mim install "mmcv>=2.0.0" -i https://pypi.tuna.tsinghua.edu.cn/simple
```

Some modules that need to be compiled to run:

1. `mamba`
2. `dcnv3`
3. `dcnv4`

# Comes with some file descriptions

1. train.py  
A script for training the model
2. detect.py  
Inferential script
3. improved\_YOLOv8\ultralytics\cfg\datasets\fruit.yaml  
Data set path
4. improved\_YOLOv8\ultralytics\cfg\models\Add  
Configuration files for different improvement models

```
import warnings
warnings.filterwarnings('ignore')
from ultralytics import YOLO

if __name__ == '__main__':
    model = YOLO('yolov8-C2f-UIB-CA-Adown.yaml')
    model.train(data=r'/root/yolov8/ultralytics/cfg/datasets/fruit.yaml',

                cache=False,
                imgsz=640,
                epochs=200,
                single_cls=False,
                batch=64,
                close_mosaic=0,
                workers=4,
                device='0',
                optimizer='SGD',

                amp=True,
                project='runs/train',
                name='exp',
                )
```



*Comments to the train.py file*
